# Supplementary material for: Trapping volatile nitrosamines with copper incorporated zeolitesElectronic supplementary information (ESI) available: experimental details. See http://www.rsc.org/suppdata/cc/b3/b304322c/
Source: Royal Society of Chemistry journal article supplement (doi:10.1039/b304322c), 2003-01-01
Supplement: b304322c.doc [file b304322c.doc]

# Preparation and evaluation of CuO incorporated zeolite

Electronic Supplementary Information (ESI)

Zeolite NaY with an Si/Al ratio of 2.86, NaZSM-5 (Si/Al=23) were commercially available powders. The mesoporous materials SBA-15 was prepared in our laboratory according to recipes in the literature [1]. The Virginia type cigarettes with a tar value of 15 mg/cigarette and a nicotine value of 1.3 mg/cigarette were purchased from the market.The sample of CuO incorporated molecular sieve like CuO/NaY was prepared in a conventional “drying impregnation” [2] procedure: 0.456 g Cu(NO3)23H2O was dissolved with 40 ml H2O at first, then the NaY powder of 5g was added into this solution meanwhile the suspension was stirred strongly at ambient temperature for 4h and heated up to half dryness followed by drying overnight at 373K. After ground to 100 mesh, the obtained product was calcined at 773 K in air for 6h and denoted as 3%CuO/NaY. Other samples were prepared in the same way but the concentration of Cu(NO3)2 aqueous solution is adjusted according to the different loading amount of copper ions within the porous materials.

Adsorption of nitrosamines was performed in a fixed-bed microreactor connected with a Varian 3380 gas chromatograph (GC). 5 mg sample was filled in a stainless steel tube (Ф3150 mm) which was inserted between the injector of GC and the chromatographic column (10％Carbowax 20M+5％KOH, Ф33000 mm), and the sample was directly heated to the given temperature without activation. The flow rate of H2 carrier gases was 30 ml/min, and the nitrosamines solution was pulse injected on the sample with an amounts of 2 L each time. Gaseous effluent from the reactor was analyzed by the on-line Varian 3700 gas chromatograph, and the decrement in the ratio of NPYR or NDMA to the solvent was utilized to calculate the amount of *N*-nitrosamine adsorbed on zeolite.

In another adsorption experiment on the mainstream smoke, 40 cigarettes were conditioned at 295 K and 60% relative humidity for 48h. They were then machine smoked under the standard ISO machine smoking regime of one 35 ml puff of 2s duration taken every minute to a butt length of (filter tipping overwrap +3) mm under ambient conditions of 295 K and 60%relative humidity. The mainstream smoke first passed through the adsorption column of 0.5g zeolite or porous material, then passed the citrate-phosphate buffer solution with pH of 4.5 including 20-mM ascorbic acid to absorb the residual nitrosamines in the smoke. To obtain the final sample the buffer solution was thoroughly extracted with methylene chloride at first, and then the extractives were dried by anhydrous sodium sulfate and concentrated. Finally the amount of nitrosamines in the sample was determined by the improved spectrophotometric method in the following procedure.

10 ml of the test solution were put into a test tube with a branch in it by which the carrier could pass through the bottom of the test tube, 0.5ml of HBr in glacial acetic acid was then added to chemically denitrosate the nitrosaminesand liberate the denitrosated gaseous product [3]. Purged in N2 carrier gas for 0.5h, the formed gaseous product was purified through three consecutive traps containing 10 ml of 5 mol/L NaOH solution and oxidized to NO2 by passing through a CrO3 tube in which 0.4g CrO3 was mixed with 7.6g sea sand and dried at 383 K prior use. The flow rate of the N2 carrier gas was controlled at 200 ml/min. After being absorbed in the solution of sulfanilamide and N-1-naphthylethylenediamine dihydrochloride, the NO2 was converted to NO2- and then the amount of NO2- was detected by a Digital Visible Spectrophotometer at 540 nm [4]. Finally the mean total amount of nitrosamines was determined through the NaNO2 concentration *via* an absorbency curve.

## References

1. D. Zhao, J. Feng, Q. Huo, N.W. Melosh, G.H. Frederickson, B.F. Chmelka, G.D. Stucky,

*Science,* 1998, **279**, 548.

2. J.L. Dong, J.H. Zhu, Q.H. Xu, *Appl. Catal. A: General* 1994, **112**, 105.

3. G. Eisenbrand, R. Preussmann, *Arzneimittel Forsch.* 1970, **20**, 1513.

4. B.E. Saltzman, *Anal. Chem.*1954,**26**, 1949.
